# Supplementary material for: Lippia graveolens Essential Oil to Enhance the Effect of Imipenem against Axenic and Co-Cultures of Pseudomonas aeruginosa and Acinetobacter baumannii
Source: MDPI journal article supplement (doi:10.3390/antibiotics13050444), 2024-05-14
Supplement: s1 [file s1]

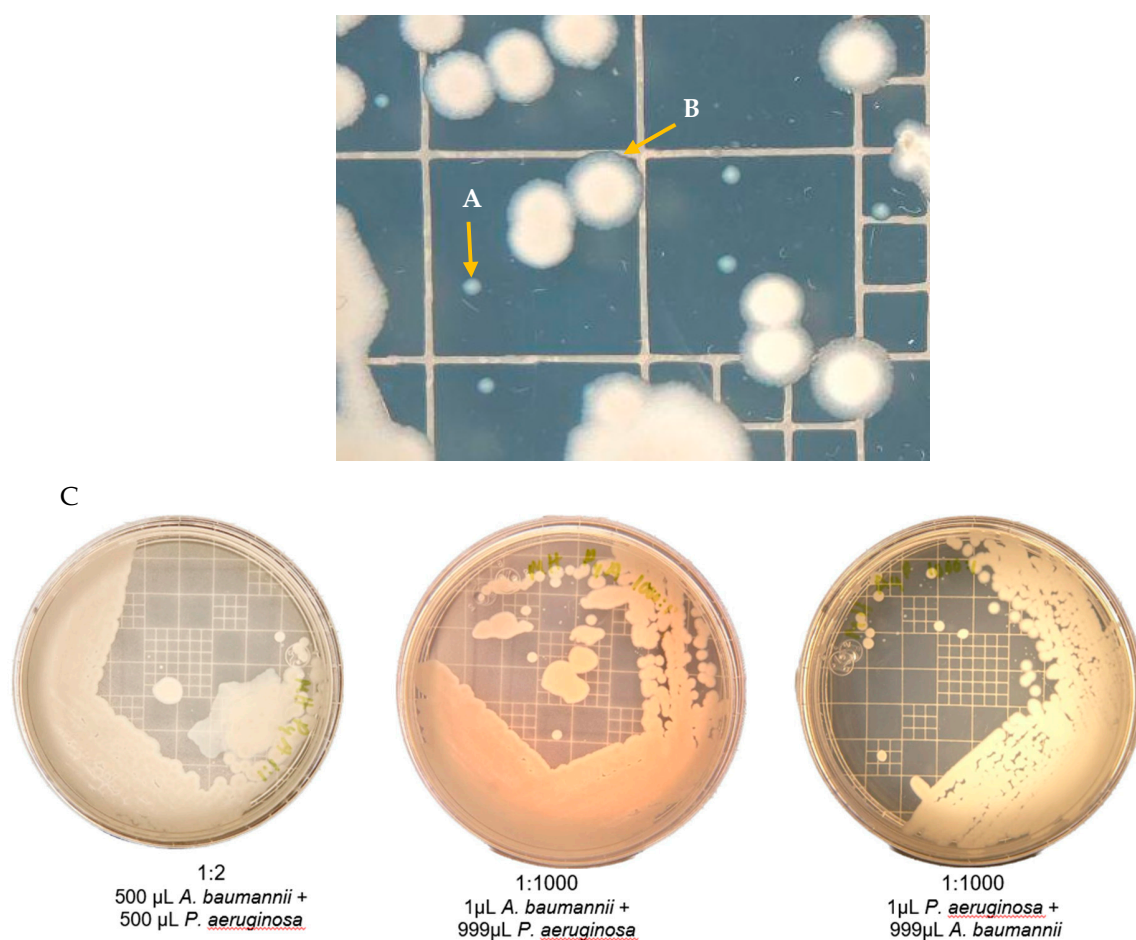

**Figure S1.** Macroscopic morphology of *P. aeruginosa* and *A. baumannii* colonies in co-culture ratio 1:1000. A) Particular colony of *P. aeruginosa* with circular, punctate, small and whitish morphology. B) Particular colony of *A. baumannii* with circular, creamy, large and whitish morphology. C) Growing patterns in different ratios of *A. baumannii* and *P. aeruginosa*.

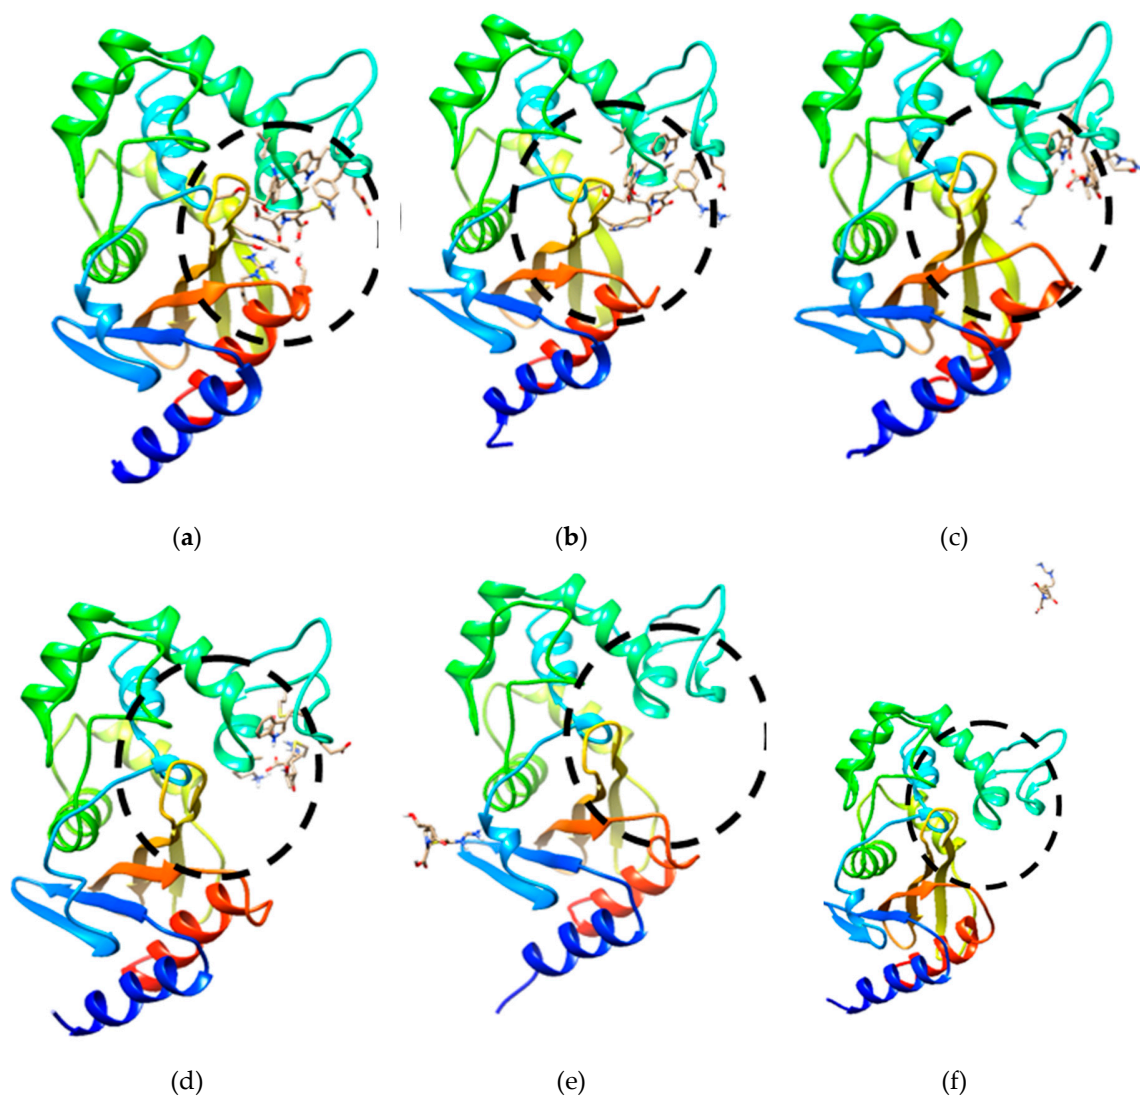

**Figure S2.** Dynamic interaction of Imipenem and OXA-51 (4ZDX) enzyme over time (in nanoseconds). a) 0 ns, b) 3 ns, c) 10 ns, d) 20 ns, e) 40 ns, f) 50 ns.

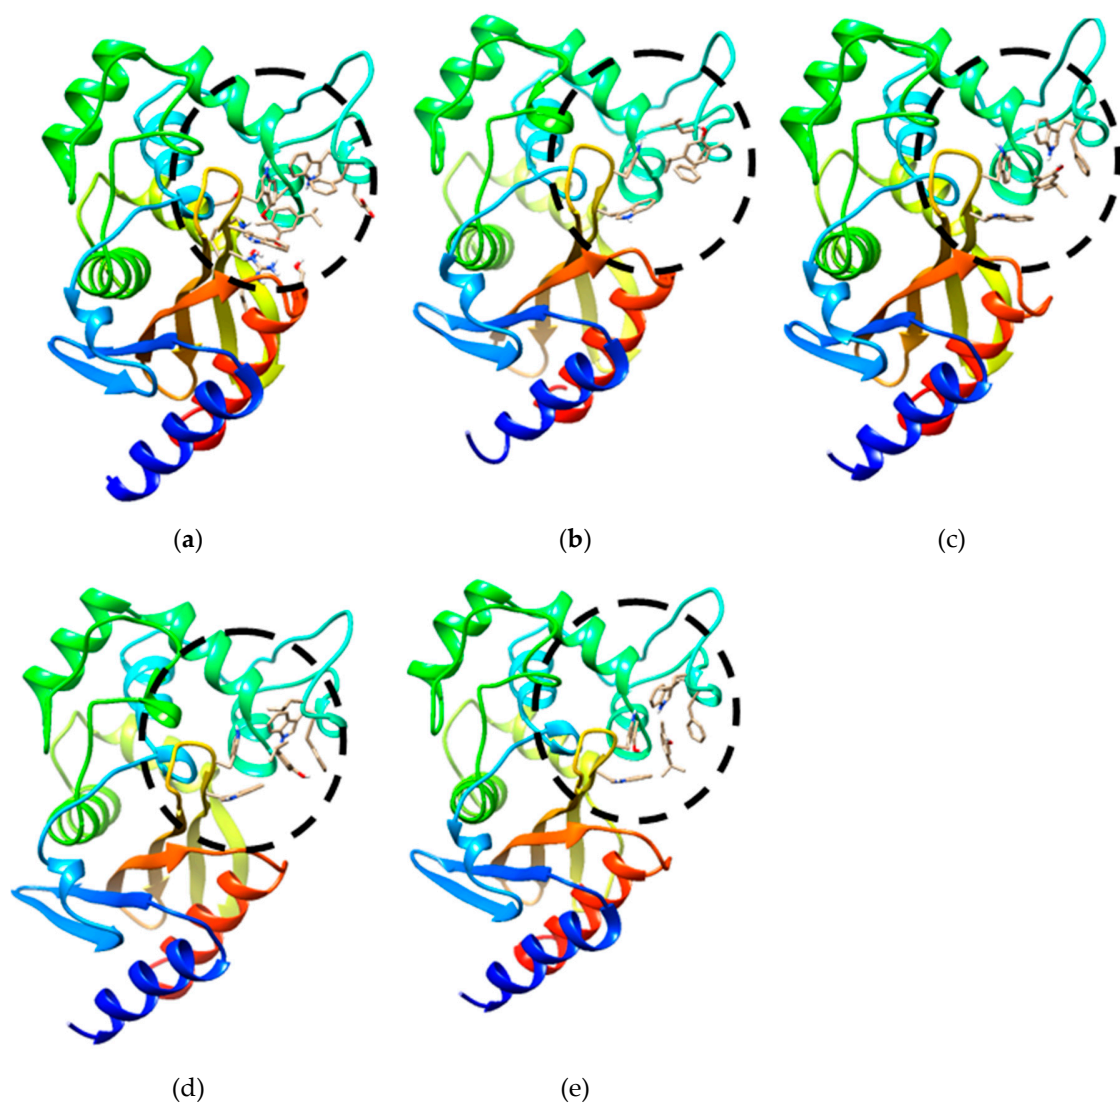

**Figure S3.** Dynamic interaction of carvacrol and OXA-51 (4ZDX) enzyme over time (in nanoseconds). a) 0 ns, b) 15 ns, c) 30 ns, d) 40 ns, e) 50 ns.

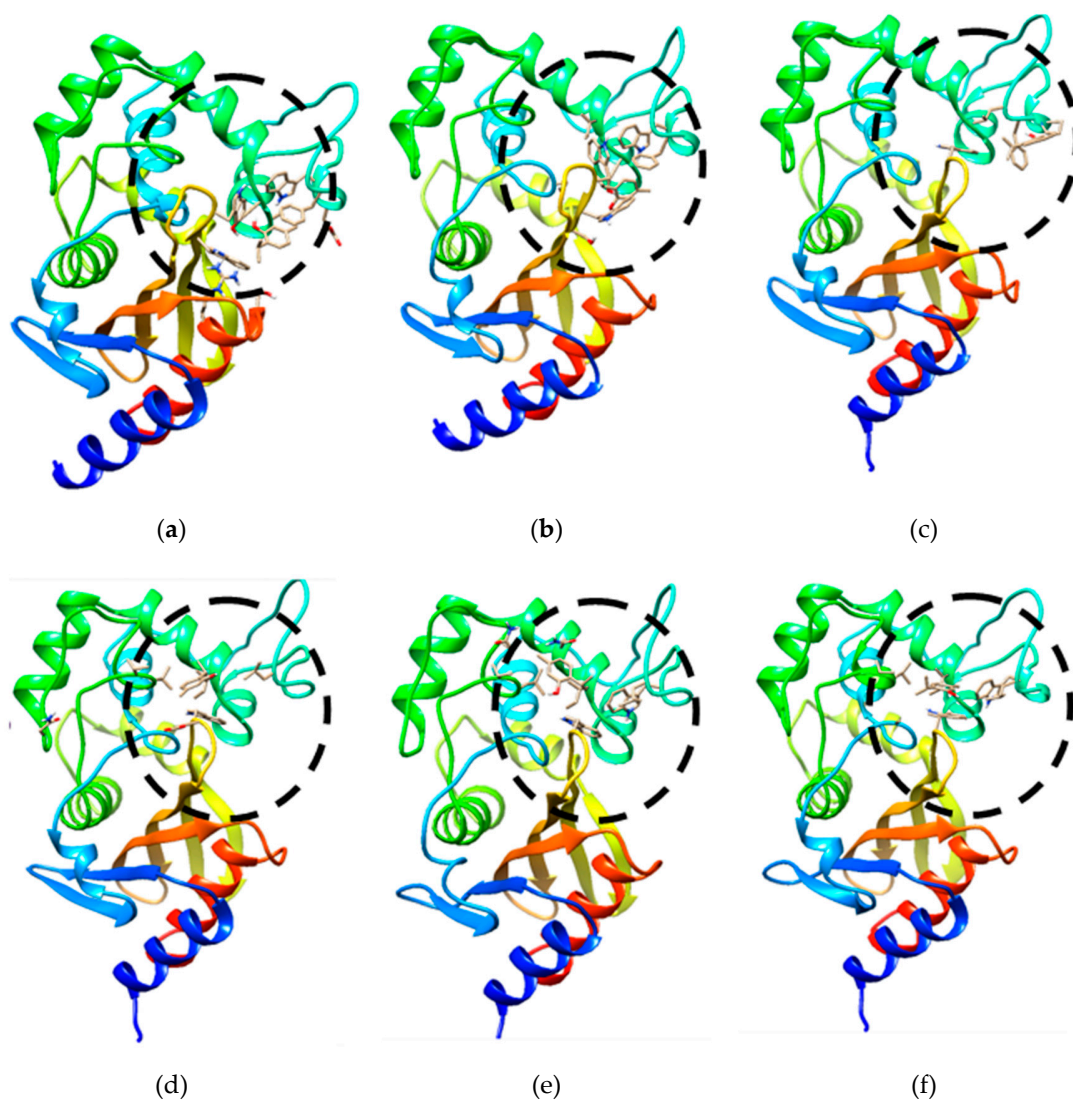

**Figure S4.** Dynamic interaction of thymol and OXA-51 (4ZDX) enzyme over time (in nanoseconds). a) 0 ns, b) 5 ns, c) 25 ns, d) 34 ns, e) 40 ns, and f) 50 ns.



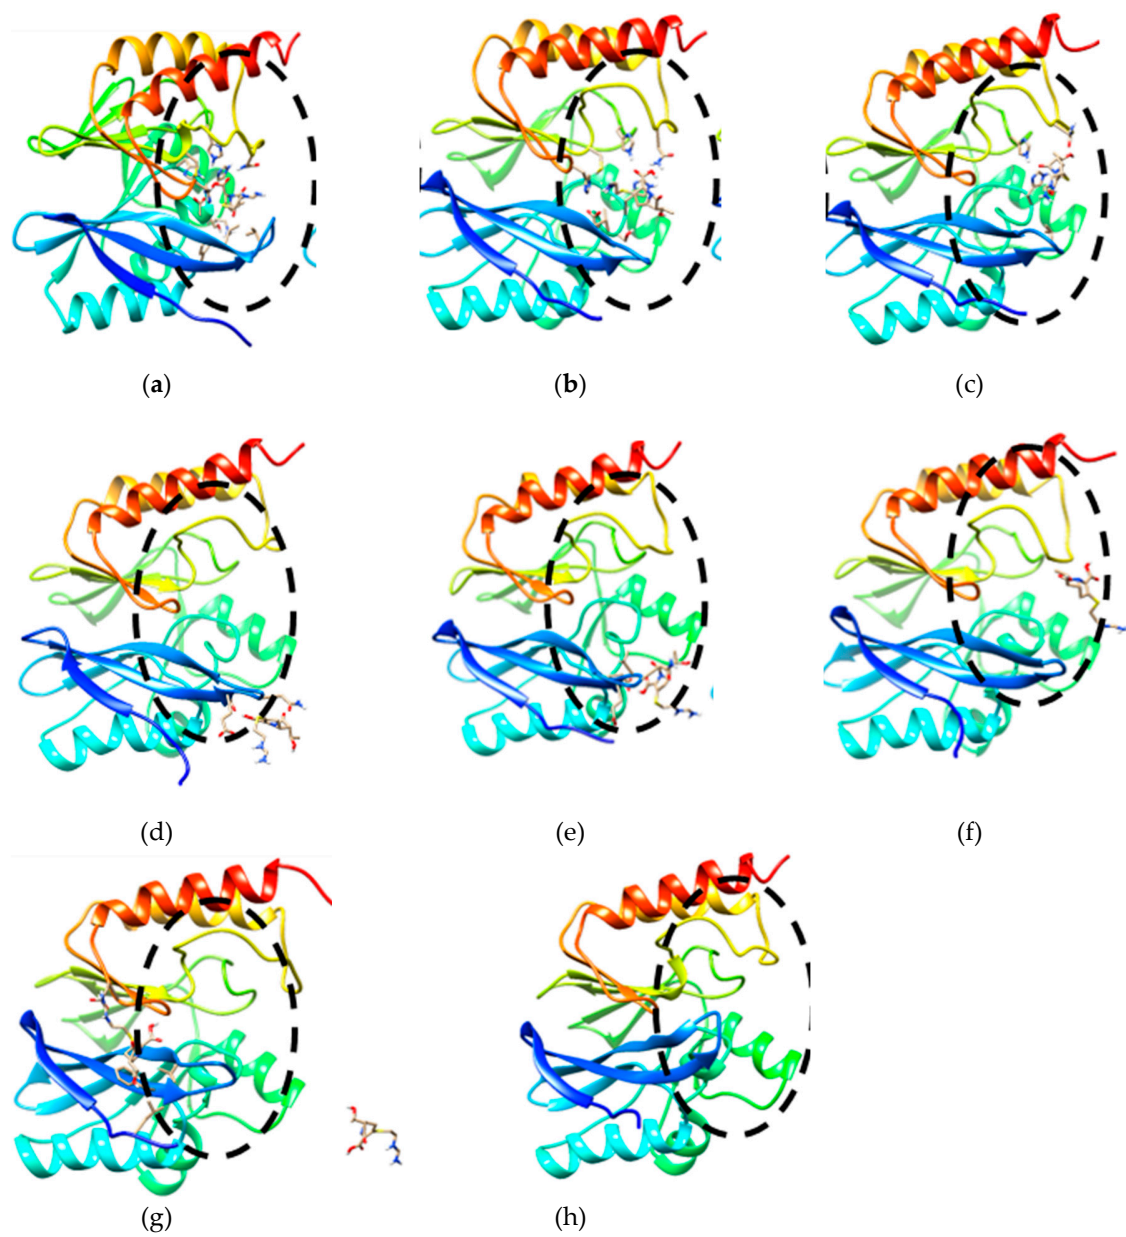

**Figure S5.** Dynamic interaction of imipenem and IMP-1 (1DDK) enzyme over time (in nanoseconds). a) 0 ns, b) 2 ns, c) 5 ns, d) 10 ns, e) 15 ns, f) 25 ns, g) 45 ns, h) 50 ns.

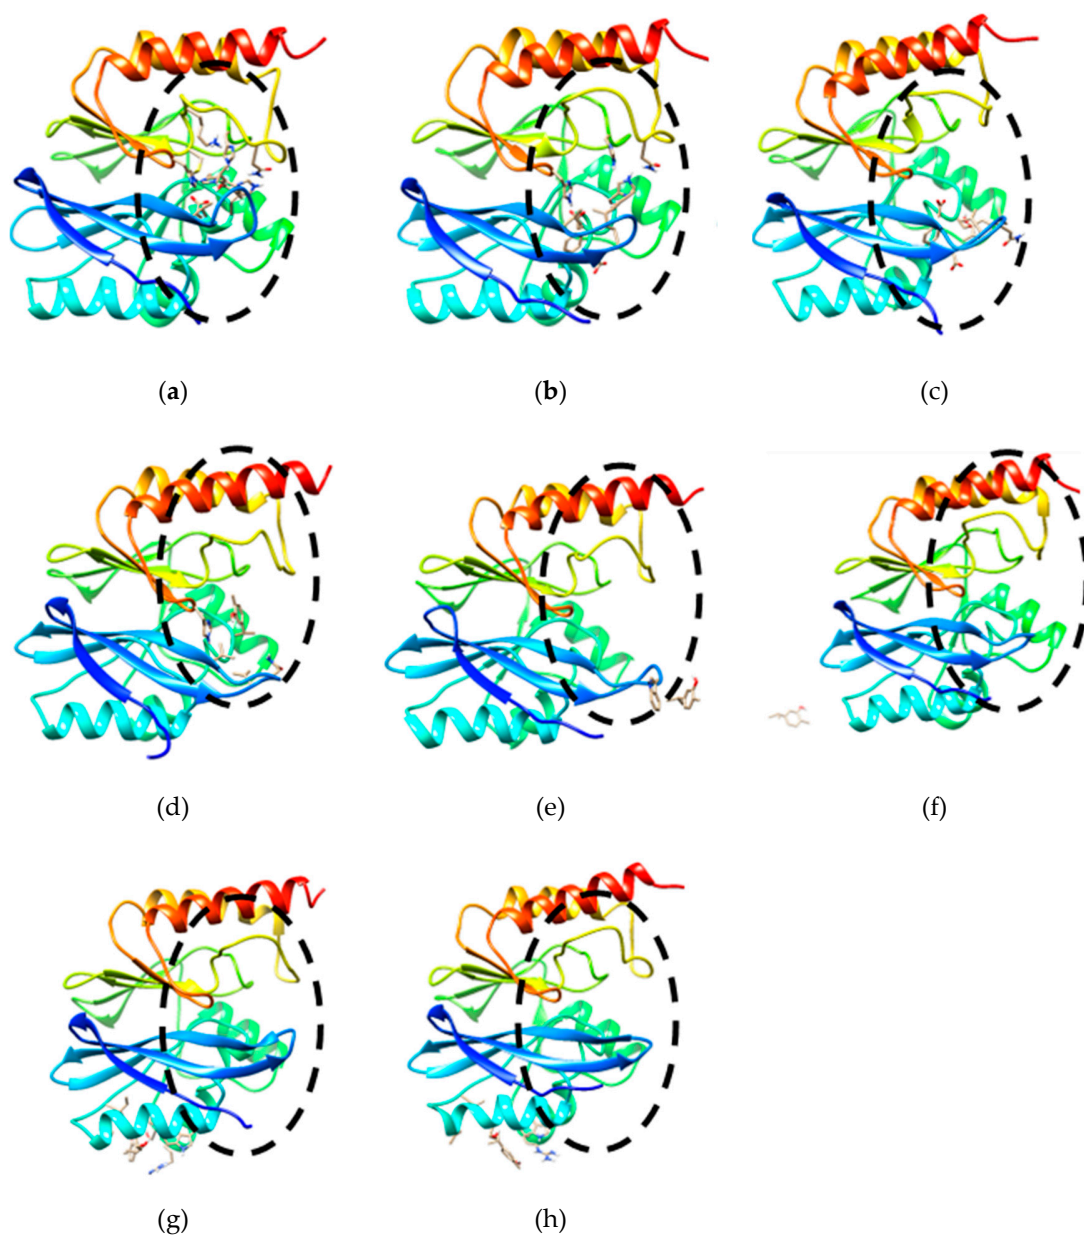

**Figure S6.** Dynamic interaction of carvacrol and IMP-1 (1DDK) enzyme over time (in nanoseconds). a) 0 ns, b) 5 ns, c) 10 ns, d) 19 ns, e) 21 ns, f) 25 ns, g) 47 ns, h) 50 ns.

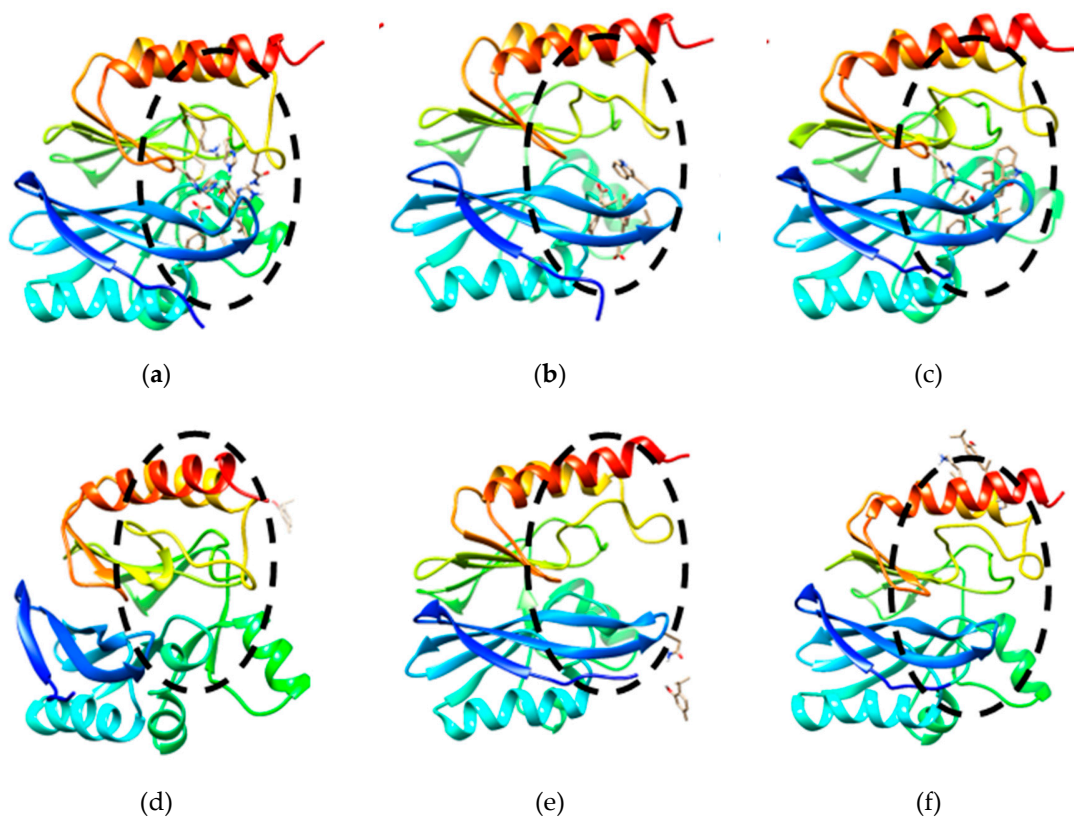

**Figure S7.** Dynamic interaction of thymol and IMP-1 (1DDK) enzyme over time (in nanoseconds). a) 0 ns, b) 10 ns, c) 20 ns, d) 30 ns, e) 40 ns, f) 50 ns.

**Table S1.** Active site coordinates of the OXA-51 (PDB: 4ZDX) and IMP-1 (PDB: 1DDK) enzymes prepared in UCSF Chimera software version 1.16. The amino acids present in each region are included.

| Enzyme | Center      | Size        | Aminoacids                             |
|--------|-------------|-------------|----------------------------------------|
| OXA-51 | 23.1202 (x) | 28.5741 (x) | Lys83, Ser127, Trp166, Lys217,         |
|        | 30.4202 (y) | 30.8404 (y) | Arg260, Ser80, Phe111, Trp114,         |
|        | 21.6143 (z) | 37.1683 (z) | Ile129, Leu167, Ser218, Trp220, Trp222 |
| IMP-1  | 11.997 (x)  | 26.9028 (x) | Glu23, Val25, Trp28, Phe51,            |
|        | 4.0829 (y)  | 20.7375 (y) | Asp81, His79, His197, His77,           |
|        | 57.6211 (z) | 15.905 (z)  | Cys158, His139, Lys161                 |
